# Supplementary material
Source: publisher figshare collection journal article supplement (https://acs.figshare.com/ndownloader/files/13035269)
Supplement: Supplementary file 1 [file 13035269]

## 1. APPENDIX

| Reference                   | Number of species and reactions | Validation domain                                  | Mechanism validation              | Toluene | Ethanol | Acetic acid |
|-----------------------------|---------------------------------|----------------------------------------------------|-----------------------------------|---------|---------|-------------|
| Sivaramakrishnan et al. [1] | 87 species<br>262 reactions     | 1200-1900 K<br>27-45 bar                           | ST                                | x       |         |             |
| Dagaut et al. [2]           | 120 species<br>920 reactions    | 1000-1375 K<br>1 bar<br>$\phi = 0.5-1.5$           | PSR, LFS                          | x       |         |             |
| Colket and Seery [3]        | 98 species<br>529 reactions     | 1200-1850 K<br>10.0 bar                            | ST                                | x       |         |             |
| Emdee et al. [4]            | 130 reactions                   | 1100-1190 K<br>1 bar<br>$\phi = 0.65-1.38$         | FR                                | x       |         |             |
| Lindstedt and Maurice [5]   | 141 species<br>743 reactions    | 1515-2100 K<br>0.3-7.01 bar<br>$\phi = 0.63-1.4$   | TR                                | x       |         |             |
| Metcalfe et al. [6]         | 329 species<br>1888 reactions   | 800-1500 K<br>1-550 bar<br>$\phi = 0.3-5.0$        | ST, FR<br>JSR, LFS                | x       |         |             |
| Huang et al. [7]            | 120 species<br>531 reactions    | K<br>0.04-80 bar<br>$\phi = 0.5-1.5$               | ST, LFS,<br>LPF, HCCI,<br>CFF, EA | x       |         |             |
| Cai and Pitsch [8]          | 335 species<br>1610 reactions   | 300-1250 K<br>1-40 bar<br>$\phi = 0.5-2.0$         | ST, LFS,<br>JSR                   | x       | x       |             |
| Leplat and Vandooren [9]    | 43 species<br>270 reactions     | 400 K<br>0.05 bar<br>$\phi = 0.77, 0.9, 1.05$      | LPF                               |         |         | x           |
| Christensen and Konnov [10] | 100 species<br>1140 reactions   | 338-358 K<br>0.05, 1 bar<br>$\phi = 0.7-1.3$       | LFS, LPF                          |         | x       | x           |
| Marinov [11]                | 57 species<br>387 reactions     | 1000-1700 K<br>1-4.5 bar<br>$\phi = 0.5-2.0$       | ST, JSR<br>FR, CFF                |         | x       |             |
| Saxena and Williams [12]    | 36 species<br>192 reactions     | $\leq 1000$ K<br>$\leq 100$ bar<br>$\phi \leq 3.0$ | CFF, ST                           |         | x       |             |
| Cancino et al. [13]         | 136 species<br>1349 reactions   | 650-1220 K<br>30-50 bar<br>$\phi = 0.3-1.0$        | ST                                |         | x       |             |
| Leplat et al. [14]          | 36 species<br>252 reactions     | 890-1250 K<br>1 bar<br>$\phi = 0.25-2.0$           | LPF, JSR<br>ST                    |         | x       |             |
| Present work                | 180 species<br>1495 reactions   | 300-2000 K<br>1-100 bar<br>$\phi = 0.5-1.5$        | ST<br>LFS                         | x       | x       | x           |

Table A1: Non-exhaustive list of available chemical schemes for toluene, ethanol and acetic acid. ST: shock tubes, PSR: perfectly stirred reactor, LFS: laminar flame speed, FR: flow reactors, TR: turbulent reactor, JSR: jet-stirred reactor, LPF: laminar premixed flames, HCCI: homogeneous charge compression ignition, CFF: counterflow flame, EA: engine application.

| Reactions                                  | Huang et al. [7] |       |         | Christensen and Konnov [10] |                        |                          |
|--------------------------------------------|------------------|-------|---------|-----------------------------|------------------------|--------------------------|
|                                            | A                | n     | E       | A                           | n                      | E                        |
| $H_2 + M = 2H + M$                         | 4.577E19         | -1.4  | 1.044E5 | 7.000E+17 <sup>rev</sup>    | -1.0000 <sup>rev</sup> | 0.00 <sup>rev</sup>      |
| $2O + M = O_2 + M$                         | 6.165E15         | -0.5  | 0.0E0   | 1.000E+17                   | -1.0000                | 0.00                     |
| $O + H + M = OH + M$                       | 4.714E18         | -1.0  | 0.0E0   | 6.750E+18                   | -1.0000                | 0.00                     |
| $H + OH + M = H_2O + M$                    | 3.5E22           | -2.0  | 0.0E0   | 6.060E+27 <sup>rev</sup>    | -3.3120 <sup>rev</sup> | 120769.99 <sup>rev</sup> |
| <b><math>H + O_2(+M) = HO_2(+M)</math></b> | 4.65E12          | 0.44  | 0.0E0   | 4.660E+12                   | 0.4400                 | 0.00                     |
| <b><math>H_2O_2(+M) = 2OH(+M)</math></b>   | 2.0E12           | 0.9   | 4.875E4 | 2.000E+12                   | 0.9000                 | 48749.99                 |
| <b><math>O + H_2 = H + OH</math></b>       | 5.08E4           | 2.67  | 6.292E3 | 5.080E+04                   | 2.6700                 | 6292.00                  |
| <b><math>H + O_2 = O + OH</math></b>       | 1.04E14          | 0.0   | 1.529E4 | 1.040E+14                   | 0.0000                 | 15286.00                 |
| $OH + H_2 = H + H_2O$                      | 4.38E13          | 0.0   | 6.99E3  | 2.140E+08                   | 1.5200                 | 3450.00                  |
| $O + H_2O = 2OH$                           | 2.97E6           | 2.02  | 1.34E4  | 3.340E+04 <sup>rev</sup>    | 2.4200 <sup>rev</sup>  | -1930.00 <sup>rev</sup>  |
| $HO_2 + O = OH + O_2$                      | 3.25E13          | 0.0   | 0.0E0   | 2.850E+10                   | 1.0000                 | -723.90                  |
| <b><math>HO_2 + H = 2OH</math></b>         | 7.079E13         | 0.0   | 2.95E2  | 7.080E+13                   | 0.0000                 | 300.00                   |
| $H_2 + O_2 = H + HO_2$                     | 5.176E5          | 2.433 | 5.35E4  | 7.400E+05                   | 2.4300                 | 53499.99                 |
| $HO_2 + OH = H_2O + O_2$                   | 2.456E13         | 0.0   | -4.97E2 | 7.000E+12                   | 0.0000                 | -1093.00                 |
| $HO_2 + OH = H_2O + O_2$                   | 2.456E13         | 0.0   | -4.97E2 | 4.500E+14                   | 0.0000                 | 10930.00                 |
| $H_2O_2 + H = H_2 + HO_2$                  | 2.15E10          | 1.0   | 6.0E3   | 5.020E+06                   | 2.0700                 | 4300.00                  |
| $H_2O_2 + H = H_2O + OH$                   | 2.41E13          | 0.0   | 3.97E3  | 2.030E+07                   | 2.0200                 | 2620.00                  |
| <b><math>H_2O_2 + O = OH + HO_2</math></b> | 9.55E6           | 2.0   | 3.97E3  | 9.550E+06                   | 2.0000                 | 3970.00                  |

Table B1: Package 1 (Species  $H_2$ ,  $H_2O$ ,  $HO_2$ ,  $H_2O_2$ ). Reaction rate coefficients given in the form  $k = AT^n \exp(-E/RT)$ . Units are mol cm cal s. Highlighted reactions correspond to those with similar Arrhenius constants for both models. Superscript <sup>rev</sup> in Christensen and Konnov [10] corresponds to the reverse reactions constants, as for these reactions, the reactives in Huang et al. [7] correspond to the products in Christensen and Konnov [10], and vice versa.

| Reactions                                                | Huang et al. [7] |       |          | Christensen and Konnov [10] |                       |                        |
|----------------------------------------------------------|------------------|-------|----------|-----------------------------|-----------------------|------------------------|
|                                                          | A                | n     | E        | A                           | n                     | E                      |
| $CH + O = CO + H$                                        | 5.7E13           | 0.0   | 0.0E0    | 4.000E+13                   | 0.0000                | 0.00                   |
| <b><math>CH + OH = HCO + H</math></b>                    | 3.0E13           | 0.0   | 0.0E0    | 3.000E+13                   | 0.0000                | 0.00                   |
| $CH_2 + H = CH + H_2$                                    | 1.0E18           | -1.56 | 0.0E0    | 1.750E+14 <sup>rev</sup>    | 0.0000 <sup>rev</sup> | 3320.00 <sup>rev</sup> |
| $CH + H_2O = H + CH_2O$                                  | 1.713E13         | 0.0   | -7.55E2  | 1.770E+16                   | -1.2200               | 24.00                  |
| $CH + O_2 = HCO + O$                                     | 3.3E13           | 0.0   | 0.0E0    | 4.800E+12                   | 0.0000                | 0.00                   |
| $CH_2 + O \Rightarrow CO + 2H$                           | 5.0E13           | 0.0   | 0.0E0    | 1.000E+14                   | 0.0000                | 536.00                 |
| $CH_2 + OH = CH + H_2O$                                  | 1.13E7           | 2.0   | 3.0E3    | 8.630E+05                   | 2.0190                | 6776.00                |
| $CH_2 + O_2 = HCO + OH$                                  | 1.06E13          | 0.0   | 1.5E3    | 1.650E+12                   | 0.0000                | 1737.00                |
| $CH_2 + O_2 \Rightarrow CO_2 + 2H$                       | 2.64E12          | 0.0   | 1.5E3    | 8.250E+11                   | 0.0000                | 1737.00                |
| $CH_3 + O = CH_2O + H$                                   | 5.54E13          | 0.05  | -1.36E2  | 4.432E+13                   | 0.0500                | -136.00                |
| $CH_3 + O_2 = CH_3O + O$                                 | 7.546E12         | 0.0   | 2.832E4  | 2.110E+13                   | 0.0000                | 32471.00               |
| $CH_3 + O_2 = CH_2O + OH$                                | 2.641E0          | 3.283 | 8.105E3  | 6.390E+11                   | 0.0000                | 13515.00               |
| <b><math>CH_3 + O_2(+M) = CH_3O_2(+M)</math></b>         | 7.812E9          | 0.9   | 0.0E0    | 7.810E+09                   | 0.9000                | 0.00                   |
| <b><math>CH_3 + HO_2 = CH_3O + OH</math></b>             | 1.0E12           | 0.269 | -6.875E2 | 1.000E+12                   | 0.2688                | -688.00                |
| <b><math>CH_3 + HO_2 = CH_4 + O_2</math></b>             | 1.16E5           | 2.23  | -3.022E3 | 1.190E+05                   | 2.2280                | -3023.00               |
| $2CH_3 = H + C_2H_5$                                     | 2.109E5          | 2.297 | 1.215E4  | 5.400E+13                   | 0.0000                | 16055.00               |
| $2CH_3(+M) = C_2H_6(+M)$                                 | 2.277E15         | -0.69 | 1.749E2  | 3.610E+13                   | 0.0000                | 0.00                   |
| $CH_3 + H(+M) = CH_4(+M)$                                | 1.27E16          | -0.63 | 3.83E2   | 2.890E+13                   | 0.1930                | -10.00                 |
| <b><math>CH_4 + H = CH_3 + H_2</math></b>                | 6.14E5           | 2.5   | 9.587E3  | 6.140E+05                   | 2.5000                | 9590.00                |
| $CH_4 + O = CH_3 + OH$                                   | 1.02E9           | 1.5   | 8.6E3    | 4.400E+05                   | 2.5000                | 6577.00                |
| $CH_4 + OH = CH_3 + H_2O$                                | 5.83E4           | 2.6   | 2.19E3   | 1.000E+06                   | 2.1800                | 2462.00                |
| $CH_4 + HO_2 = CH_3 + H_2O_2$                            | 1.695E1          | 3.74  | 2.101E4  | 1.130E+01                   | 3.7400                | 21000.00               |
| $CO + O(+M) = CO_2(+M)$                                  | 1.362E10         | 0.0   | 2.384E3  | 1.060E+13                   | -0.3080               | 6943.00                |
| $CO + OH = CO_2 + H$                                     | 7.015E4          | 2.053 | -3.557E2 | 2.230E+05                   | 1.9000                | -1160.00               |
| $CO + O_2 = CO_2 + O$                                    | 1.119E12         | 0.0   | 4.77E4   | 5.060E+13                   | 0.0000                | 63189.99               |
| <b><math>CO + HO_2 = CO_2 + OH</math></b>                | 1.57E5           | 2.18  | 1.794E4  | 1.570E+05                   | 2.1800                | 17940.00               |
| $HCO + M = H + CO + M$                                   | 5.7E11           | 0.66  | 1.487E4  | 4.750E+11                   | 0.6600                | 14870.00               |
| $HCO + H = CO + H_2$                                     | 7.34E13          | 0.0   | 0.0E0    | 1.200E+14                   | 0.0000                | 0.00                   |
| <b><math>HCO + O = CO + OH</math></b>                    | 3.02E13          | 0.0   | 0.0E0    | 3.000E+13                   | 0.0000                | 0.00                   |
| <b><math>HCO + O = CO_2 + H</math></b>                   | 3.0E13           | 0.0   | 0.0E0    | 3.000E+13                   | 0.0000                | 0.00                   |
| $HCO + OH = CO + H_2O$                                   | 1.02E14          | 0.0   | 0.0E0    | 1.100E+14                   | 0.0000                | 0.00                   |
| $HCO + O_2 = CO + HO_2$                                  | 7.58E12          | 0.0   | 4.1E2    | 6.920E+06                   | 1.9000                | -1370.00               |
| <b><math>HCO + HO_2 \Rightarrow CO_2 + H + OH</math></b> | 3.0E13           | 0.0   | 0.0E0    | 3.000E+13                   | 0.0000                | 0.00                   |
| $HCO + CH_3 = CH_4 + CO$                                 | 2.65E13          | 0.0   | 0.0E0    | 1.849E+20                   | -2.3000               | 4781.00                |
| <b><math>2HCO = CH_2O + CO</math></b>                    | 1.8E13           | 0.0   | 0.0E0    | 1.800E+13                   | 0.0000                | 0.00                   |
| <b><math>2HCO \Rightarrow H_2 + 2CO</math></b>           | 3.0E12           | 0.0   | 0.0E0    | 3.000E+12                   | 0.0000                | 0.00                   |

Table B2: Package 2 (Species  $CO$ ,  $CO_2$ ,  $HCO$ ,  $CH$ ,  $CH_2$ ,  $CH_3$ ,  $CH_4$ ). Reaction rate coefficients given in the form  $k = AT^n \exp(-E/RT)$ . Units are mol cm cal s. Highlighted reactions correspond to those with similar Arrhenius constants for both models. Superscript <sup>rev</sup> in Christensen and Konnov [10] corresponds to the reverse reactions constants, as for these reactions, the reactives in Huang et al. [7] correspond to the products in Christensen and Konnov [10], and vice versa.

| Reactions                                                | Huang et al. [7] |        |          | Christensen and Konnov [10] |                        |                         |
|----------------------------------------------------------|------------------|--------|----------|-----------------------------|------------------------|-------------------------|
|                                                          | A                | n      | E        | A                           | n                      | E                       |
| $HCO + H(+M) = CH_2O(+M)$                                | 1.09E12          | 0.48   | -2.6E2   | 1.260E+36 <sup>rev</sup>    | -5.5000 <sup>rev</sup> | 93993.99 <sup>rev</sup> |
| $CO + H_2(+M) = CH_2O(+M)$                               | 4.3E7            | 1.5    | 7.96E4   | 4.400E+38 <sup>rev</sup>    | -6.1000 <sup>rev</sup> | 93993.99 <sup>rev</sup> |
| $CH_2O + H = HCO + H_2$                                  | 5.74E7           | 1.9    | 2.74E3   | 5.860E+03                   | 3.1300                 | 1514.00                 |
| $CH_2O + O = HCO + OH$                                   | 6.26E9           | 1.15   | 2.26E3   | 4.160E+11                   | 0.5700                 | 2762.00                 |
| $CH_2O + OH = HCO + H_2O$                                | 7.82E7           | 1.63   | -1.055E3 | 2.390E+07                   | 1.8300                 | -1117.00                |
| $CH_2O + O_2 = HCO + HO_2$                               | 8.07E15          | 0.0    | 5.342E4  | 2.440E+05                   | 2.5000                 | 36465.00                |
| $CH_2O + HO_2 = HCO + H_2O_2$                            | 1.88E4           | 2.7    | 1.152E4  | 4.100E+04                   | 2.5000                 | 10210.00                |
| $CH + CH_2O = H + CH_2CO$                                | 9.46E13          | 0.0    | -5.15E2  | 1.460E+16                   | -0.8000                | -81.80                  |
| $CH_2O + CH_3 = HCO + CH_4$                              | 3.83E1           | 3.36   | 4.312E3  | 3.190E+01                   | 3.3600                 | 4312.00                 |
| $CH_3O(+M) = CH_2O + H(+M)$                              | 6.8E13           | 0.0    | 2.617E4  | 1.130E+10                   | 1.2100                 | 24085.00                |
| $CH_3O + H = CH_2O + H_2$                                | 2.0E13           | 0.0    | 0.0E0    | 3.780E+13                   | 0.0000                 | 596.00                  |
| $CH_3O + O_2 = CH_2O + HO_2$                             | 4.38E-19         | 9.5    | -5.501E3 | 2.290E+03                   | 2.4000                 | 413.00                  |
| $CH_3O + CH_3 = CH_2O + CH_4$                            | 1.2E13           | 0.0    | 0.0E0    | 2.410E+13                   | 0.0000                 | 0.00                    |
| <b><math>CH_2O + CH_3O = CH_3OH + HCO</math></b>         | 6.62E11          | 0.0    | 2.294E3  | 6.600E+11                   | 0.0000                 | 2300.00                 |
| $2CH_3O = CH_3OH + CH_2O$                                | 6.03E13          | 0.0    | 0.0E0    | 7.800E+12                   | 0.0000                 | 0.00                    |
| $CH_2O + H(+M) = CH_2OH(+M)$                             | 5.4E11           | 0.454  | 3.6E3    | 7.370E+10 <sup>rev</sup>    | 0.8110 <sup>rev</sup>  | 39585.00 <sup>rev</sup> |
| $CH_2OH + H = CH_2O + H_2$                               | 6.0E12           | 0.0    | 0.0E0    | 3.000E+13                   | 0.0000                 | 0.00                    |
| $O + CH_2OH = OH + CH_2O$                                | 4.2E13           | 0.0    | 0.0E0    | 6.560E+12                   | 0.0000                 | -693.00                 |
| <b><math>OH + CH_2OH = H_2O + CH_2O</math></b>           | 2.4E13           | 0.0    | 0.0E0    | 2.400E+13                   | 0.0000                 | 0.00                    |
| $CH_2OH + HO_2 = CH_2O + H_2O_2$                         | 1.2E13           | 0.0    | 0.0E0    | 6.300E+11                   | 0.2800                 | -813.00                 |
| $CH_2OH + HO_2 = CH_2O + H_2O_2$                         | 1.2E13           | 0.0    | 0.0E0    | 6.800E+11                   | 0.2100                 | -454.00                 |
| $CH_2OH + HCO = 2CH_2O$                                  | 1.8E14           | 0.0    | 0.0E0    | 1.500E+13                   | 0.0000                 | 0.00                    |
| $CH_3OH + HCO = CH_2OH + CH_2O$                          | 9.63E3           | 2.9    | 1.311E4  | 5.480E+03 <sup>rev</sup>    | 2.8100 <sup>rev</sup>  | 5862.00 <sup>rev</sup>  |
| <b><math>CH_2OH + CH_3O = CH_2O + CH_3OH</math></b>      | 2.4E13           | 0.0    | 0.0E0    | 2.400E+13                   | 0.0000                 | 0.00                    |
| $2CH_2OH = CH_2O + CH_3OH$                               | 3.0E12           | 0.0    | 0.0E0    | 9.000E+12                   | 0.0000                 | 0.00                    |
| <b><math>CH_3OH(+M) = CH_3 + OH(+M)</math></b>           | 2.084E18         | -0.615 | 9.254E4  | 2.080E+18                   | -0.6148                | 92549.99                |
| <b><math>CH_3OH(+M) = CH_2OH + H(+M)</math></b>          | 7.896E-3         | 5.038  | 8.447E4  | 7.900E-03                   | 5.0380                 | 84475.99                |
| $CH_3OH + H = CH_2OH + H_2$                              | 3.07E5           | 2.55   | 5.44E3   | 3.040E+14                   | -0.1690                | 7796.00                 |
| $CH_3OH + H = CH_3O + H_2$                               | 1.99E5           | 2.56   | 1.03E4   | 7.470E+14                   | -0.4010                | 12774.00                |
| $CH_3OH + O = CH_2OH + OH$                               | 3.88E5           | 2.5    | 3.08E3   | 5.300E+04                   | 2.6100                 | 1870.00                 |
| $CH_3OH + OH = CH_2OH + H_2O$                            | 3.08E4           | 2.65   | -8.067E2 | 5.140E+04                   | 2.6200                 | -682.00                 |
| $CH_3OH + OH = CH_3O + H_2O$                             | 1.5E2            | 3.03   | -7.63E2  | 5.710E+03                   | 2.6200                 | -682.00                 |
| $CH_3OH + O_2 = CH_2OH + HO_2$                           | 2.05E13          | 0.0    | 4.49E4   | 3.580E+05                   | 2.2700                 | 42764.00                |
| $CH_3OH + HO_2 = CH_2OH + H_2O_2$                        | 1.08E4           | 2.55   | 1.053E4  | 3.500E-04                   | 4.8500                 | 10134.00                |
| $CH_3OH + CH_3 = CH_2OH + CH_4$                          | 3.19E1           | 3.17   | 7.172E3  | 7.100E+00                   | 3.4800                 | 7055.00                 |
| $CH_3 + CH_3OH = CH_4 + CH_3O$                           | 1.44E1           | 3.1    | 6.935E3  | 4.290E+02                   | 2.6400                 | 7101.00                 |
| <b><math>CH_3O + CH_3OH = CH_2OH + CH_3OH</math></b>     | 3.0E11           | 0.0    | 4.074E3  | 3.000E+11                   | 0.0000                 | 4070.00                 |
| $CH + CO_2 = HCO + CO$                                   | 1.7E12           | 0.0    | 6.85E2   | 6.360E+07                   | 1.5100                 | -715.00                 |
| <b><math>CH_3O_2 + H = CH_3O + OH</math></b>             | 9.6E13           | 0.0    | 0.0E0    | 9.600E+13                   | 0.0000                 | 0.00                    |
| $CH_3O_2 + O = CH_3O + O_2$                              | 3.6E13           | 0.0    | 0.0E0    | 2.600E+13                   | 0.0000                 | 0.00                    |
| <b><math>CH_3O_2 + OH = CH_3OH + O_2</math></b>          | 6.0E13           | 0.0    | 0.0E0    | 6.000E+13                   | 0.0000                 | 0.00                    |
| $CH_3O_2 + HO_2 = CH_3O_2H + O_2$                        | 2.47E11          | 0.0    | -1.57E3  | 2.530E+11                   | 0.0000                 | -1490.00                |
| <b><math>CH_3O_2 + CH_3 = 2CH_3O</math></b>              | 5.08E12          | 0.0    | -1.411E3 | 5.000E+12                   | 0.0000                 | -1410.00                |
| $CH_4 + CH_3O_2 = CH_3 + CH_3O_2H$                       | 9.6E-1           | 3.77   | 1.781E4  | 1.210E+01                   | 3.7500                 | 21200.00                |
| $CH_3O_2 + CH_2O = CH_3O_2H + HCO$                       | 1.99E12          | 0.0    | 1.166E4  | 2.000E+12                   | 0.0000                 | 11660.00                |
| <b><math>CH_3OH + CH_3O_2 = CH_2OH + CH_3O_2H</math></b> | 1.81E12          | 0.0    | 1.371E4  | 1.810E+11                   | 0.0000                 | 13700.00                |
| $2CH_3O_2 => CH_2O + CH_3OH + O_2$                       | 3.11E14          | -1.61  | -1.051E3 | 2.240E+15                   | -1.8700                | -541.00                 |
| $2CH_3O_2 => O_2 + 2CH_3O$                               | 1.4E16           | -1.61  | 1.86E3   | 5.870E+16                   | -1.8700                | 1700.00                 |
| $H_2 + CH_3O_2 = H + CH_3O_2H$                           | 1.5E14           | 0.0    | 2.603E4  | 8.790E+10 <sup>rev</sup>    | 0.0000 <sup>rev</sup>  | 1860.00 <sup>rev</sup>  |

Table B3: Package 3 (Species  $CH_2O$ ,  $CH_3O$ ,  $CH_2OH$ ,  $CH_3OH$ ,  $CH_3O_2$ ,  $CH_3O_2H$ ). Reaction rate coefficients given in the form  $k = AT^n \exp(-E/RT)$ . Units are mol cm cal s. Highlighted reactions correspond to those with similar Arrhenius constants for both models. Superscript <sup>rev</sup> in Christensen and Konnov [10] corresponds to the reverse reactions constants, as for these reactions, the reactives in Huang et al. [7] correspond to the products in Christensen and Konnov [10], and vice versa.

| Reactions                                          | Huang et al. [7] |         |            | Christensen and Konnov [10] |                        |                          |
|----------------------------------------------------|------------------|---------|------------|-----------------------------|------------------------|--------------------------|
|                                                    | A                | n       | E          | A                           | n                      | E                        |
| $H_2 + C_2H \rightleftharpoons C_2H_2 + H$         | 0.1080E+14       | 0.0000  | 0.2165E+04 | 2.100E+06                   | 2.3200                 | 880.00                   |
| $C_2H + OH \rightleftharpoons CH_2 + CO$           | 0.1810E+14       | 0.0000  | 0.0000E+00 | 1.800E+13                   | 0.0000                 | 0.00                     |
| $C_2H_2 + O = CH_2 + CO$                           | 7.395E8          | 1.28    | 2.472E3    | 2.350E+08                   | 1.4000                 | 2200.00                  |
| $C_2H_2 + O = HCCO + H$                            | 2.958E9          | 1.28    | 2.472E3    | 9.400E+08                   | 1.4000                 | 2200.00                  |
| $C_2H_2 + OH = CH_3 + CO$                          | 1.00E7           | 1.432   | 4.315E3    | 1.280E+09                   | 0.7300                 | 2579.00                  |
| $C_2H_2 + OH \rightleftharpoons C_2H + H_2O$       | 0.6000E+14       | 0.0000  | 0.1292E+05 | 2.630E+06                   | 2.1400                 | 17060.00                 |
| $C_2H_2 + OH = CH_2CO + H$                         | 1.50E5           | 2.132   | 4.048E3    | 7.530E+06                   | 1.5500                 | 2106.00                  |
| $C_2H_2 + CH_2 \rightleftharpoons C_3H_3 + H$      | 0.1200E+14       | 0.0000  | 0.6577E+04 | 1.200E+13                   | 0.0000                 | 6620.00                  |
| $C_2H_2 + H(+M) = C_2H_3(+M)$                      | 1.71E10          | 1.266   | 2.709E3    | 3.860E+08 <sup>rev</sup>    | 1.6200 <sup>rev</sup>  | 37060.00 <sup>rev</sup>  |
| $C_2H_3 + H(+M) = C_2H_4(+M)$                      | 6.08E12          | 0.27    | 2.8E2      | 6.080E+12                   | 0.2700                 | 280.00                   |
| $C_2H_3 + H = C_2H_2 + H_2$                        | 9.0E13           | 0.0     | 0.0E0      | 4.200E+13                   | 0.0000                 | 0.00                     |
| $C_2H_3 + OH = C_2H_2 + H_2O$                      | 3.011E13         | 0.0     | 0.0E0      | 3.000E+13                   | 0.0000                 | 0.00                     |
| $C_2H_3 + O_2 \rightleftharpoons C_2H_2 + HO_2$    | 0.1120E+15       | -0.8330 | 0.2541E+04 | 5.190E+15                   | -1.2600                | 3310.00                  |
| $C_2H_3 + O_2 \rightleftharpoons C_2H_2 + HO_2$    | 0.1120E+15       | -0.8330 | 0.2541E+04 | 2.120E-06                   | 6.0000                 | 9484.00                  |
| $C_2H_3 + O_2 = CH_2O + HCO$                       | 1.7E29           | -5.312  | 6.503E3    | 4.150E+12                   | 0.0000                 | -240.00                  |
| $CH_3 + C_2H_3 = C_3H_5 + H$                       | 1.5E24           | -2.83   | 1.861855E4 | 1.500E+24                   | -2.8300                | 18618.00                 |
| $C_2H_3 + CH_2O \rightleftharpoons C_2H_4 + HCO$   | 0.5420E+04       | 2.8100  | 0.5824E+04 | 5.420E+03                   | 2.8100                 | 5862.00                  |
| $C_2H_4 + CH_3O = C_2H_3 + CH_3OH$                 | 1.2E11           | 0.0     | 6.75E3     | 1.440E+01 <sup>rev</sup>    | 3.1000 <sup>rev</sup>  | 6940.00 <sup>rev</sup>   |
| $C_2H + C_2H_3 \rightleftharpoons 2C_2H_2$         | 0.1900E+14       | 0.0000  | 0.0000E+00 | 3.000E+13                   | 0.0000                 | 0.00                     |
| $2C_2H_3 = C_2H_2 + C_2H_4$                        | 9.6E11           | 0.0     | 0.0E0      | 1.450E+13                   | 0.0000                 | 0.00                     |
| $C_2H_4 + H = C_2H_3 + H_2$                        | 5.07E7           | 1.93    | 1.295E4    | 2.340E+02                   | 3.6200                 | 11270.00                 |
| $C_2H_4 + O = CH_3 + HCO$                          | 7.453E6          | 1.88    | 1.83E2     | 8.100E+06                   | 1.8800                 | 180.00                   |
| $C_2H_4 + OH = CH_2O + CH_3$                       | 5.00E+11         | 0.0     | 960.       | 1.780E+05                   | 1.6800                 | 2061.00                  |
| $C_2H_4 + OH = C_2H_3 + H_2O$                      | 2.23E4           | 2.745   | 2.216E3    | 1.310E-01                   | 4.2000                 | -860.00                  |
| $C_2H_4 + O_2 = C_2H_3 + HO_2$                     | 4.22E13          | 0.0     | 5.762E4    | 4.220E+13                   | 0.0000                 | 57629.99                 |
| $C_2H_3 + H_2O_2 \rightleftharpoons C_2H_4 + HO_2$ | 0.1210E+11       | 0.0000  | -5.901E+03 | 4.800E+04 <sup>rev</sup>    | 2.5000 <sup>rev</sup>  | 27620.00 <sup>rev</sup>  |
| $C_2H_4 + CH_3 = C_2H_3 + CH_4$                    | 6.62E0           | 3.7     | 9.5E3      | 6.000E+07                   | 1.5600                 | 16630.00                 |
| $C_2H_4 + CH_3O_2 = C_2H_3 + CH_3O_2H$             | 8.59E0           | 3.754   | 2.713E4    | 1.000E+13                   | 0.0000                 | 25000.00                 |
| $2C_2H_4 = C_2H_5 + C_2H_3$                        | 4.82E14          | 0.0     | 7.153E4    | 4.820E+14                   | 0.0000                 | 71539.99                 |
| $C_2H_4 + H(+M) = C_2H_5(+M)$                      | 9.569E8          | 1.463   | 1.355E3    | 1.110E+10 <sup>rev</sup>    | 1.0370 <sup>rev</sup>  | 36767.00 <sup>rev</sup>  |
| $C_2H_5 + H = C_2H_4 + H_2$                        | 2.0E12           | 0.0     | 0.0E0      | 1.700E+12                   | 0.0000                 | 0.00                     |
| $C_2H_5 + O_2 = C_2H_4 + HO_2$                     | 7.561E14         | -1.01   | 4.749E3    | 2.560E+19                   | -2.7700                | 1980.00                  |
| $CH_3 + C_2H_5 = CH_4 + C_2H_4$                    | 1.18E4           | 2.45    | -2.921E3   | 9.000E+11                   | 0.0000                 | 0.00                     |
| $C_2H_6 + CH_3O = C_2H_5 + CH_3OH$                 | 2.41E11          | 0.0     | 7.09E3     | 1.440E+01 <sup>rev</sup>    | 3.1000 <sup>rev</sup>  | 8942.00 <sup>rev</sup>   |
| $C_2H_5 + H(+M) = C_2H_6(+M)$                      | 5.21E17          | -0.99   | 1.58E3     | 8.850E+20 <sup>rev</sup>    | -1.2280 <sup>rev</sup> | 102209.99 <sup>rev</sup> |
| $C_2H_6 + H = C_2H_5 + H_2$                        | 1.15E8           | 1.9     | 7.53E3     | 1.400E+09                   | 1.5000                 | 7400.00                  |
| $C_2H_6 + O = C_2H_5 + OH$                         | 3.55E6           | 2.4     | 5.83E3     | 3.550E+06                   | 2.4000                 | 5830.00                  |
| $C_2H_6 + OH = C_2H_5 + H_2O$                      | 1.48E7           | 1.9     | 9.5E2      | 7.200E+06                   | 2.0000                 | 870.00                   |
| $C_2H_6 + O_2 = C_2H_5 + HO_2$                     | 6.03E13          | 0.0     | 5.187E4    | 7.260E+05                   | 2.5000                 | 49159.99                 |
| $C_2H_6 + HO_2 = C_2H_5 + H_2O_2$                  | 3.46E1           | 3.61    | 1.692E4    | 7.080E+04                   | 2.5000                 | 16850.00                 |
| $C_2H_6 + CH_3 = C_2H_5 + CH_4$                    | 5.48E-1          | 4.0     | 8.28E3     | 5.600E+10                   | 0.0000                 | 9420.00                  |
| $C_2H_6 + CH_3 = C_2H_5 + CH_4$                    | 5.48E-1          | 4.0     | 8.28E3     | 8.400E+14                   | 0.0000                 | 22250.00                 |
| $C_2H_6 + CH_3O_2 = C_2H_5 + CH_3O_2H$             | 1.94E1           | 3.64    | 1.71E4     | 2.950E+11                   | 0.0000                 | 14940.00                 |

Table B4: Package 4 (Species  $C_2H$ ,  $C_2H_2$ ,  $C_2H_3$ ,  $C_2H_4$ ,  $C_2H_5$ ,  $C_2H_6$ ). Reaction rate coefficients given in the form  $k = AT^n \exp(-E/RT)$ . Units are mol cm cal s. Highlighted reactions correspond to those with similar Arrhenius constants for both models. Superscript <sup>rev</sup> in Christensen and Konnov [10] corresponds to the reverse reactions constants, as for these reactions, the reactives in Huang et al. [7] correspond to the products in Christensen and Konnov [10], and vice versa.

| Reactions                                       | Huang et al. [7] |        |            | Christensen and Konnov [10] |         |          |
|-------------------------------------------------|------------------|--------|------------|-----------------------------|---------|----------|
|                                                 | A                | n      | E          | A                           | n       | E        |
| $HCCO + O \Rightarrow H + 2CO$                  | 8.0E13           | 0.0    | 0.0E0      | 1.000E+14                   | 0.0000  | 0.00     |
| $HCCO + O_2 \Rightarrow CO_2 + CO + H$          | 4.78E12          | -0.142 | 1.15E3     | 4.760E+12                   | -0.1420 | 1150.00  |
| $HCCO + O_2 \Rightarrow OH + 2CO$               | 1.91E11          | -0.02  | 1.02E3     | 1.900E+11                   | -0.0200 | 1023.00  |
| $CH + HCCO = CO + C_2H_2$                       | 5.0E13           | 0.0    | 0.0E0      | 5.000E+13                   | 0.0000  | 0.00     |
| $CH_2 + CO(+M) = CH_2CO(+M)$                    | 8.1E11           | 0.0    | 0.0E0      | 3.000E+14                   | 0.0000  | 70999.99 |
| $CH_2CO + H = CH_3 + CO$                        | 7.704E13         | -0.171 | 4.183E3    | 7.770E+08                   | 1.4500  | 2780.00  |
| $CH_2CO + H = HCCO + H_2$                       | 1.401E15         | -0.171 | 8.783E3    | 1.000E+14                   | 0.0000  | 12300.00 |
| $CH_2CO + O = HCCO + OH$                        | 1.0E13           | 0.0    | 8.0E3      | 1.870E+14                   | 0.0000  | 16690.00 |
| $CH_2CO + O = CH_2 + CO_2$                      | 1.75E12          | 0.0    | 1.35E3     | 1.080E+12                   | 0.0000  | 1350.00  |
| $CH_2CO + OH = CH_2OH + CO$                     | 2.0E12           | 0.0    | -1.01E3    | 2.640E+12                   | 0.0000  | -550.00  |
| $CH_2CO + OH = HCCO + H_2O$                     | 1.0E13           | 0.0    | 2.0E3      | 1.780E+13                   | 0.0000  | 5840.00  |
| $CH_2CO + CH_3 = C_2H_5 + CO$                   | 4.769E4          | 2.312  | 9.468E3    | 2.400E+12                   | 0.0000  | 8000.00  |
| $CH_3CO + H = CH_2CO + H_2$                     | 2.0E13           | 0.0    | 0.0E0      | 1.150E+13                   | 0.0000  | 0.00     |
| $CH_3CO + H \rightleftharpoons CH_3 + HCO$      | 0.2100E+14       | 0.0000 | 0.0000E+00 | 2.150E+13                   | 0.0000  | 0.00     |
| $CH_3CO + O = CH_2CO + OH$                      | 2.0E13           | 0.0    | 0.0E0      | 5.250E+13                   | 0.0000  | 0.00     |
| $CH_3CO + OH \rightleftharpoons CH_2CO + H_2O$  | 0.1200E+14       | 0.0000 | 0.0000E+00 | 2.800E+13                   | 0.0000  | 0.00     |
| $CH_3CO + CH_3 = CH_2CO + CH_4$                 | 5.0E13           | 0.0    | 0.0E0      | 6.100E+12                   | 0.0000  | 0.00     |
| $CH_3COCH_3 = CH_3CO + CH_3$                    | 5.113E30         | -4.194 | 8.978E4    | 4.040E+15                   | -0.8000 | 0.00     |
| $C_3H_2 + O \rightleftharpoons C_2H + H + CO$   | 0.6800E+14       | 0.0000 | 0.0000E+00 | 3.000E+13                   | 0.0000  | 0.00     |
| $C_3H_3 + O \rightleftharpoons C_2H_2 + CO + H$ | 0.1390E+15       | 0.0000 | 0.0000E+00 | 7.000E+13                   | 0.0000  | 0.00     |
| $C_3H_3 + O \rightleftharpoons CH_2O + C_2H$    | 0.1400E+15       | 0.0000 | 0.0000E+00 | 2.000E+13                   | 0.0000  | 0.00     |
| $C_3H_3 + OH \rightleftharpoons HCO + C_2H_3$   | 0.4000E+14       | 0.0000 | 0.0000E+00 | 1.330E+13                   | 0.0000  | 0.00     |
| $C_3H_3 + O_2 = CH_2CO + HCO$                   | 3.0E10           | 0.0    | 2.86807E3  | 3.010E+10                   | 0.0000  | 2870.00  |
| $C_3H_3 + HO_2 = OH + CO + C_2H_3$              | 8.0E11           | 0.0    | 0.0E0      | 8.000E+11                   | 0.0000  | 0.00     |
| $C_3H_5 + H(+M) = C_3H_6(+M)$                   | 2.0E14           | 0.0    | 0.0E0      | 2.000E+14                   | 0.0000  | 0.00     |
| $C_3H_6 + H = C_3H_5 + H_2$                     | 1.7E5            | 2.5    | 2.49283E3  | 6.457E+12                   | 0.0000  | 4445.00  |
| $C_3H_6 + H = C_2H_4 + CH_3$                    | 1.6E22           | -2.39  | 1.118547E4 | 2.600E+08                   | 1.5000  | 2000.00  |
| $C_3H_6 + O = C_2H_5 + HCO$                     | 3.5E7            | 1.65   | -9.7275E2  | 6.833E+06                   | 1.5700  | -628.00  |
| $C_3H_6 + OH = C_3H_5 + H_2O$                   | 3.1E6            | 2.0    | -2.9828E2  | 3.120E+06                   | 2.0000  | -300.00  |
| $C_3H_5 + HO_2 = C_3H_6 + O_2$                  | 2.66E12          | 0.0    | 0.0E0      | 1.080E+04                   | 2.5000  | 35730.00 |
| $NC_3H_7 = CH_3 + C_2H_4$                       | 2.284E14         | -0.55  | 2.84E4     | 1.260E+13                   | 0.0000  | 30404.00 |
| $NC_3H_7 + H = C_2H_5 + CH_3$                   | 3.7E24           | -2.92  | 1.25E4     | 3.700E+24                   | -2.9200 | 12505.00 |
| $NC_3H_7 + OH = C_3H_6 + H_2O$                  | 2.4E13           | 0.0    | 0.0E0      | 2.400E+13                   | 0.0000  | 0.00     |
| $NC_3H_7 + O_2 = C_3H_6 + HO_2$                 | 1.71E42          | -9.211 | 1.979E4    | 1.000E+12                   | 0.0000  | 5000.00  |
| $C_2H_3CO = C_2H_3 + CO$                        | 1.37E21          | -2.179 | 3.941E4    | 2.000E+13                   | 0.0000  | 28700.00 |

Table B5: Package 5 (Species  $HCCO$ ,  $CH_2CO$ ,  $CH_3CO$ ,  $C_3H_2$ ,  $C_3H_3$ ,  $C_3H_5$ ,  $C_3H_6$ ,  $NC_3H_7$ ,  $C_2H_3CO$ ,  $CH_3COCH_3$ ). Reaction rate coefficients given in the form  $k = AT^n \exp(-E/RT)$ . Units are mol cm cal s. Highlighted reactions correspond to those with similar Arrhenius constants for both models. Superscript <sup>rev</sup> in Christensen and Konnov [10] corresponds to the reverse reactions constants, as for these reactions, the reactives in Huang et al. [7] correspond to the products in Christensen and Konnov [10], and vice versa.

- [1] R. Sivaramakrishnan, R. S. Tranter, K. Brezinsky, High Pressure Pyrolysis of Toluene. 1. Experiments and Modeling of Toluene Decomposition, *The Journal of Physical Chemistry A* 110 (30) (2006) 9388–9399, doi:10.1021/jp060820j, URL <https://doi.org/10.1021/jp060820j>, PMID: 16869688.
- [2] P. Dagaut, G. Pengloan, A. Ristori, Oxidation, ignition and combustion of toluene: Experimental and detailed chemical kinetic modeling, *Phys. Chem. Chem. Phys.* 4 (2002) 1846–1854, doi:10.1039/B110282F, URL <http://dx.doi.org/10.1039/B110282F>.
- [3] M. Colket, D. Seery, Reaction mechanisms for toluene pyrolysis, *Symposium (International) on Combustion* 25 (1) (1994) 883 – 891, ISSN 0082-0784, doi:[https://doi.org/10.1016/S0082-0784\(06\)80723-X](https://doi.org/10.1016/S0082-0784(06)80723-X), twenty-Fifth Symposium (International) on Combustion.
- [4] J. L. Emdee, K. Brezinsky, I. Glassman, A kinetic model for the oxidation of toluene near 1200 K, *The Journal of Physical Chemistry* 96 (5) (1992) 2151–2161, doi:10.1021/j100184a025, URL <https://doi.org/10.1021/j100184a025>.
- [5] R. P. Lindstedt, L. Q. Maurice, Detailed Kinetic Modelling of Toluene Combustion, *Combustion Science and Technology* 120 (1-6) (1996) 119–167, doi:10.1080/00102209608935571, URL <https://doi.org/10.1080/00102209608935571>.
- [6] W. K. Metcalfe, S. Dooley, F. L. Dryer, Comprehensive Detailed Chemical Kinetic Modeling Study of Toluene Oxidation, *Energy & Fuels* 25 (11) (2011) 4915–4936, doi:10.1021/ef200900q, URL <https://doi.org/10.1021/ef200900q>.
- [7] H. Huang, J. Zhu, Z. Zhu, H. Wei, D. Lv, P. Zhang, H. Sun, Development and validation of a new reduced diesel-n-butanol blends mechanism for engine applications, *Energy Conversion and Management* 149 (2017) 553 – 563, ISSN 0196-8904, doi: <https://doi.org/10.1016/j.enconman.2017.07.056>.
- [8] L. Cai, H. Pitsch, Optimized chemical mechanism for combustion of gasoline surrogate fuels, *Combustion and Flame* 162 (5) (2015) 1623 – 1637, ISSN 0010-2180, doi:<http://dx.doi.org/10.1016/j.combustflame.2014.11.018>.
- [9] N. Leplat, J. Vandooren, Numerical and experimental study of the combustion of acetic acid in laminar premixed flames, *Combustion and Flame* 159 (2) (2012) 493 – 499, ISSN 0010-2180, doi:<https://doi.org/10.1016/j.combustflame.2011.08.007>.
- [10] M. Christensen, A. A. Konnov, Laminar burning velocity of acetic acid + air flames, *Combustion and Flame* 170 (2016) 12 – 29, ISSN 0010-2180, doi:<https://doi.org/10.1016/j.combustflame.2016.05.007>.
- [11] N. M. Marinov, A detailed chemical kinetic model for high temperature ethanol oxidation, *shock* 3 (2) (1999) 257–263.
- [12] P. Saxena, F. A. Williams, Numerical and experimental studies of ethanol flames, *Proceedings of the Combustion Institute* 31 (1) (2007) 1149–1156.
- [13] L. Cancino, M. Fikri, A. Oliveira, C. Schulz, Measurement and chemical kinetics modeling of shock-induced ignition of ethanol- air mixtures, *Energy & Fuels* 24 (5) (2010) 2830–2840.
- [14] N. Leplat, P. Dagaut, C. Togbé, J. Vandooren, Numerical and experimental study of ethanol combustion and oxidation in laminar premixed flames and in jet-stirred reactor, *Combustion and Flame* 158 (4) (2011) 705–725.
