# Supplementary material
Source: publisher figshare collection journal article supplement (https://acs.figshare.com/ndownloader/files/13035269)
Supplement: Supplementary file 2 [file 13035269]

**Paper title: Chemical Kinetic Mechanism for Pyrolysis of Bio-oil Surrogate**

**Minority species - ethyl acetate fraction**

4-methoxyphenol  
2-methoxyphenol  
4-methyl-2-methoxyphenol  
1,2-benzenediol  
2,6-dimethoxyphenol  
3-hydroxy-4-methoxybenzoic acid  
5-hexen-2-ol  
3,3-dimethyloxetane  
Propanoic acid  
4-hydroxy-2-butanone  
2,3-dihydro-1,4-dioxane  
Butoxybenzyl ether  
(2-methylbutyl) benzene  
3-methoxy-1-heptene  
1,2-ethanediol monoformate  
2,5-dimethylfuran  
4-ethyl-2,2,6,6-tetramethylheptane  
1,3-dioxolan-2-one  
1- (2-furanyl) -1-pentanone  
1- (2-furanyl) -1-hexanone  
Furane  
2-Cyclohexen-1-one  
Methylmaleic anhydride  
1-cyclopropyl-1-propanone  
1,4-dioxan-2,6-dione  
5-methyl-2-furancarboxaldehyde  
2-methoxyacetic acid  
2-heptyl-1,3-dioxolane

**Minority species - Ethyl ether fraction**

Pentanoic acid  
3-hydroxybutyric acid  
2-butanone  
Cyclobutane  
3,3-dimethyloxetane  
2,2-dimethylpropane  
Maleic acid  
Propanoic anhydride  
Trimethylene oxide  
Pyruvic acid  
2-methylpropanoic anhydride  
o-Xylene  
2-furoic acid  
2-butoxyethanol  
Propylbenzene

**Minority species - Aqueous fraction**

Acetaldehyde  
2-butanone  
*cis*-2-penten-1-ol  
3,3-dimethylacrylic acid  
Trimethylene oxide
